# Supplementary material for: Paradoxical activation of AMPK by glucose drives selective EP300 activity in colorectal cancer
Source: PubMed Central journal article supplement (PMC7326158; doi:10.1371/journal.pbio.3000732), 2020-06-30

# Raw images of western blotting

Related to Fig 1A

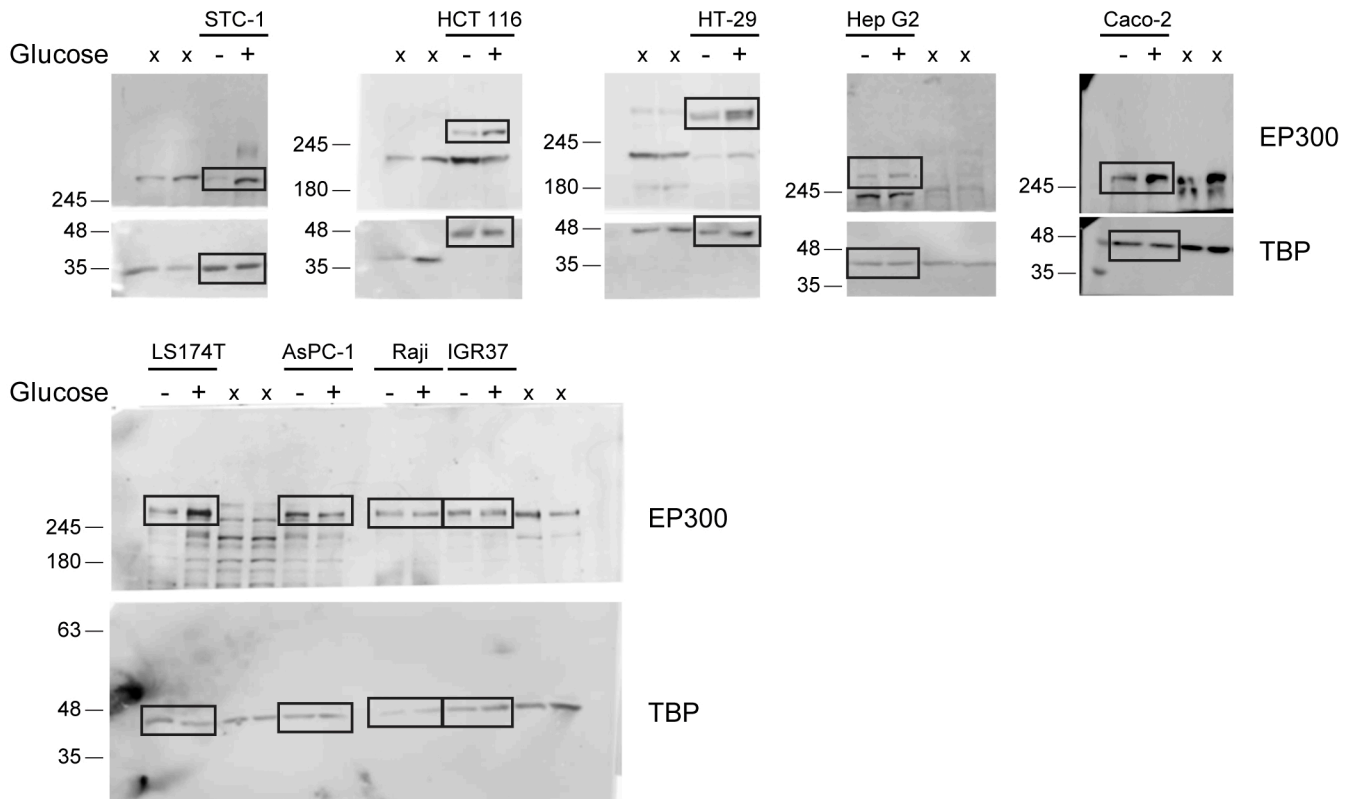

Related to Fig 1B

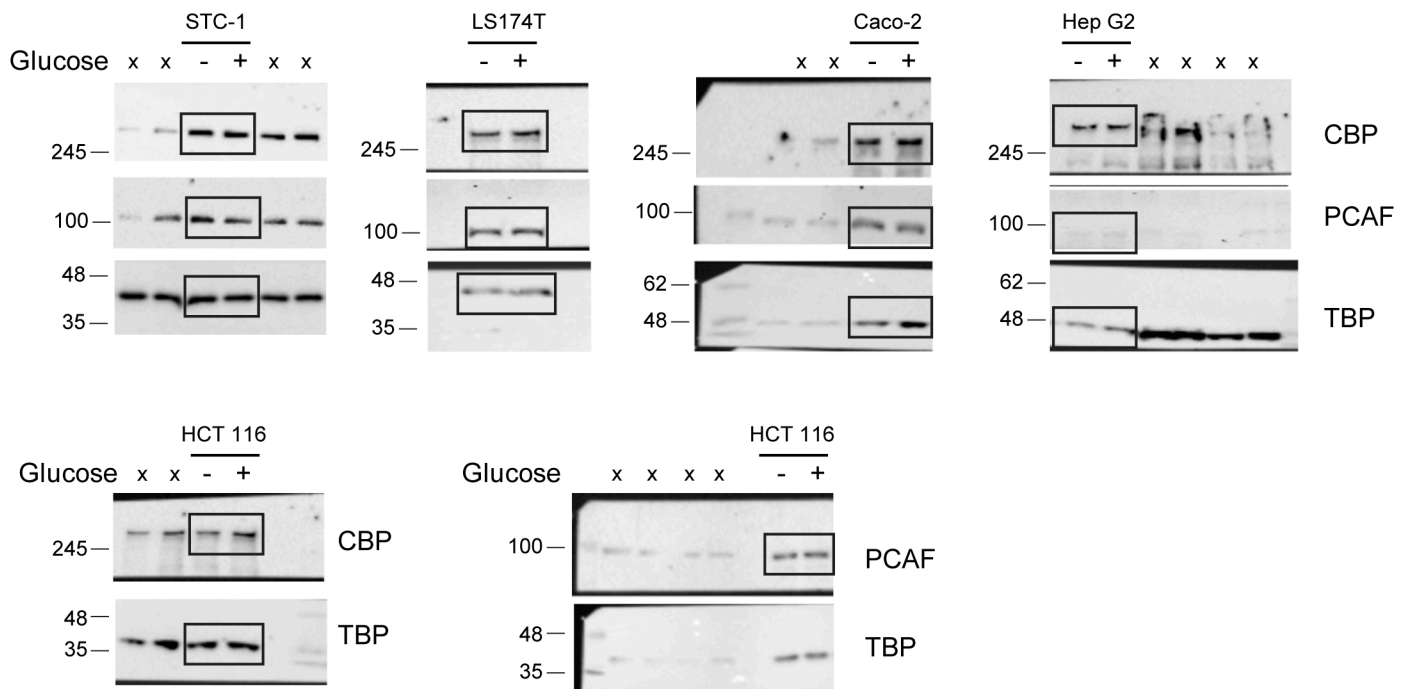

## Related to Fig 1D

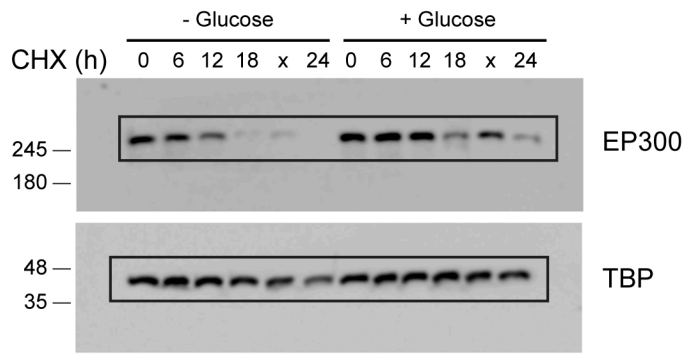

## Related to Fig 1E

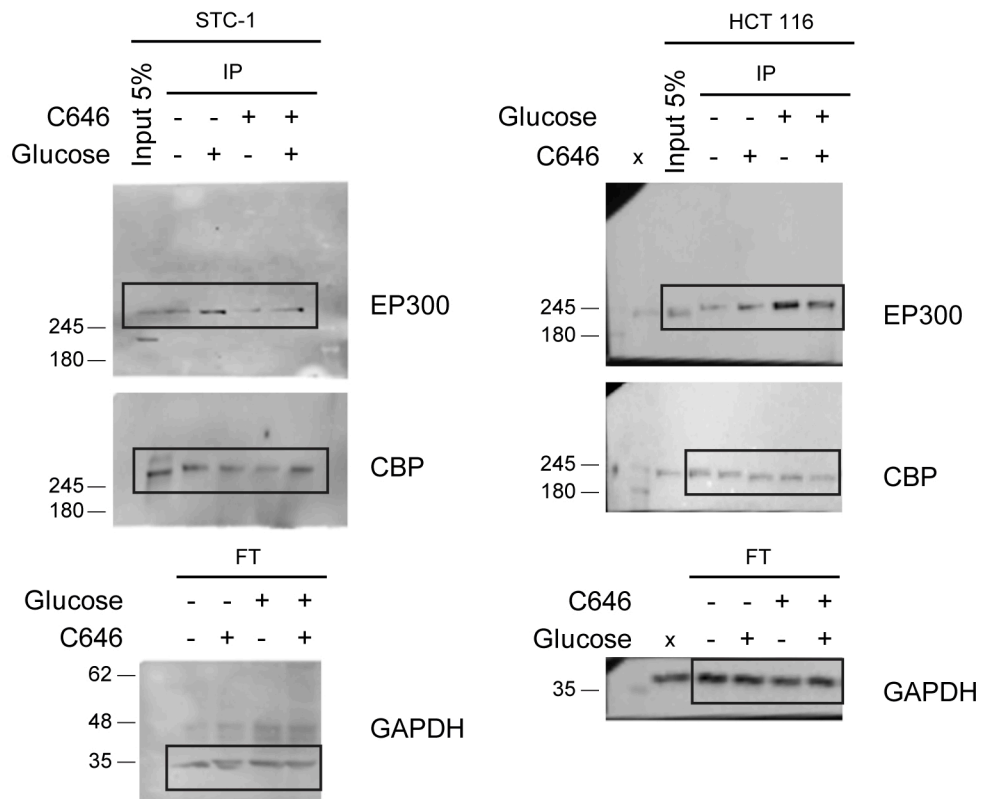

## Related to Fig 2B

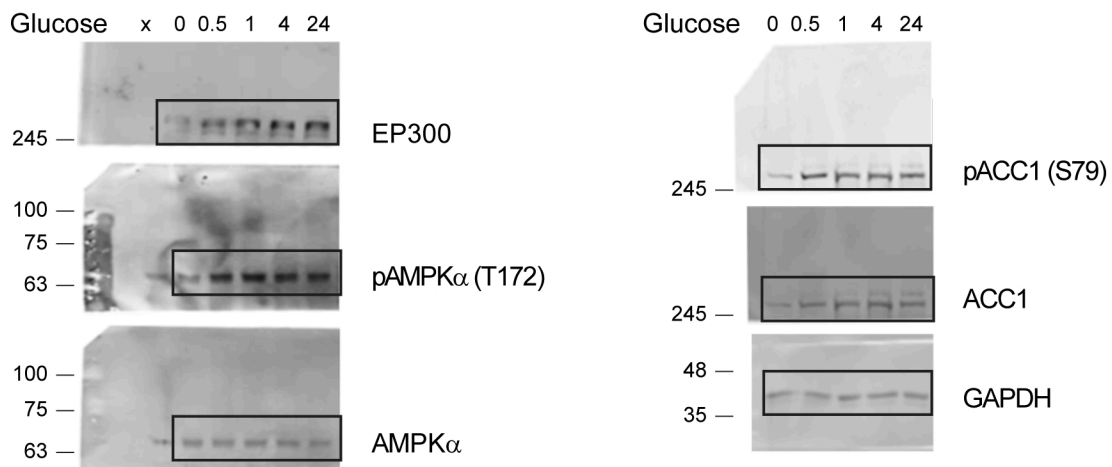

### Related to Fig 2C

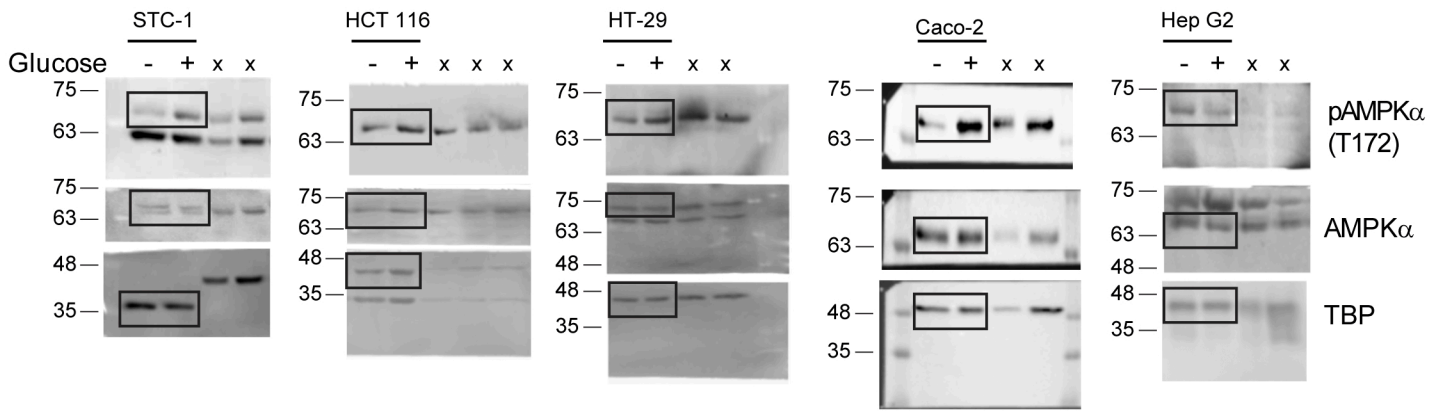

### Related to Fig 2D

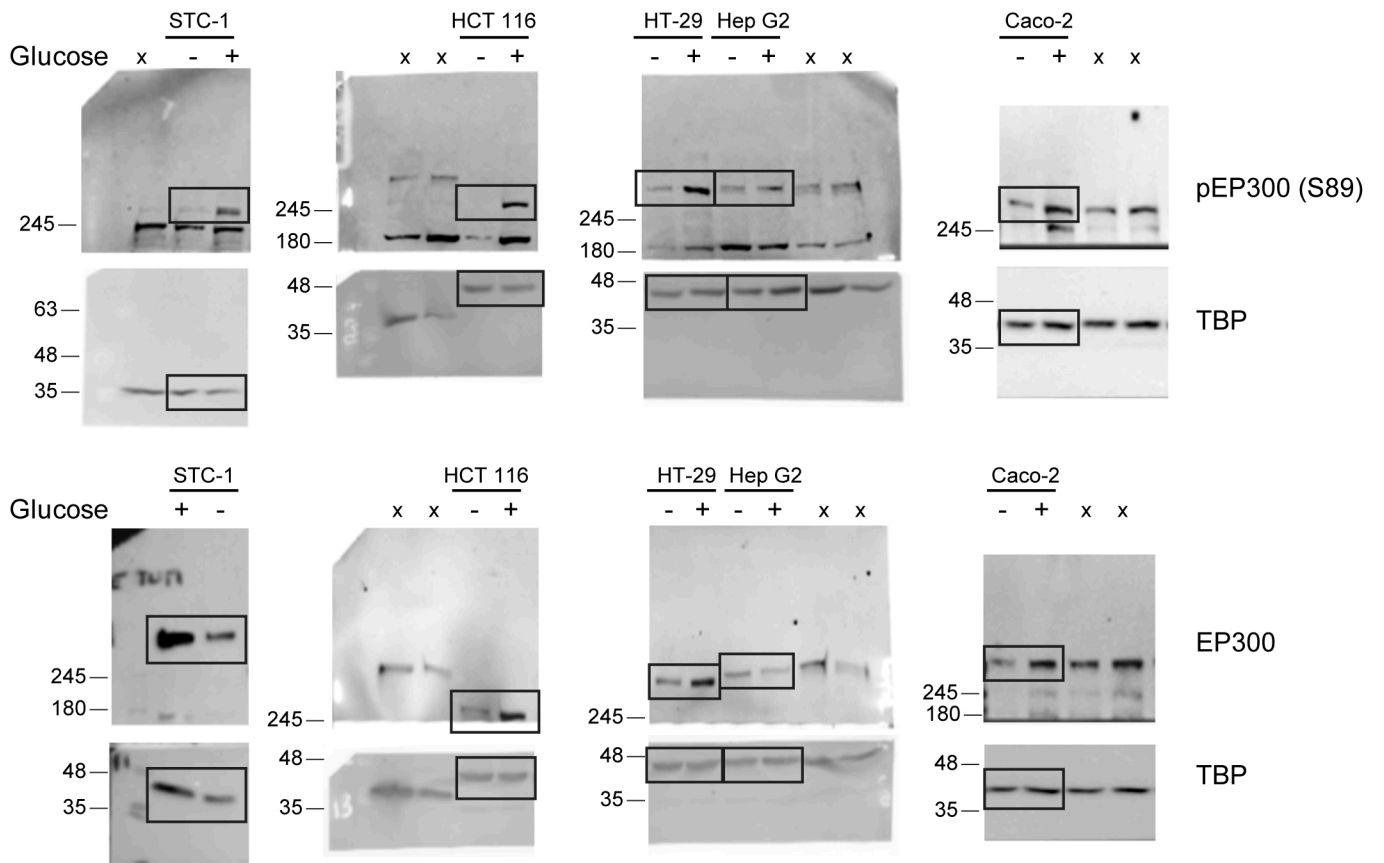

### Related to Fig 2E

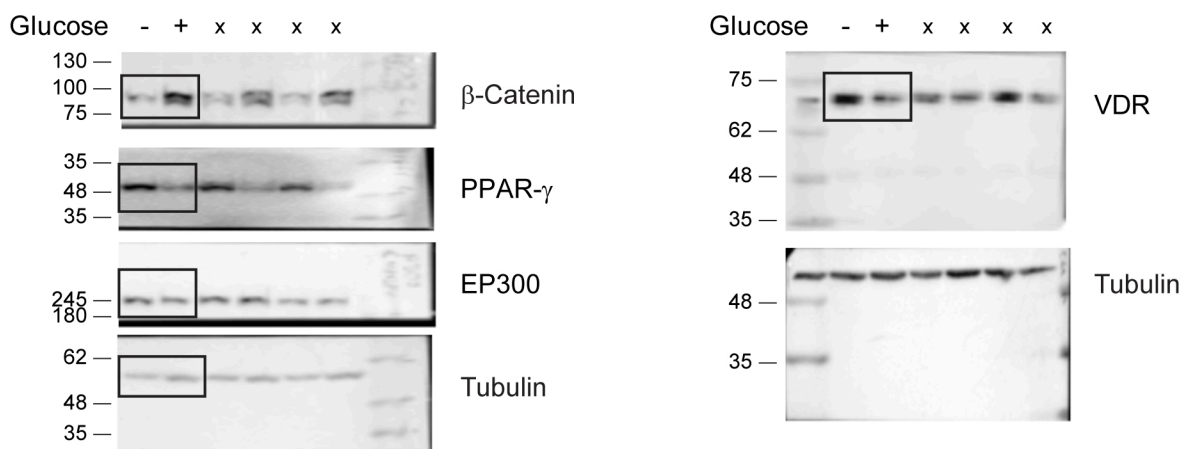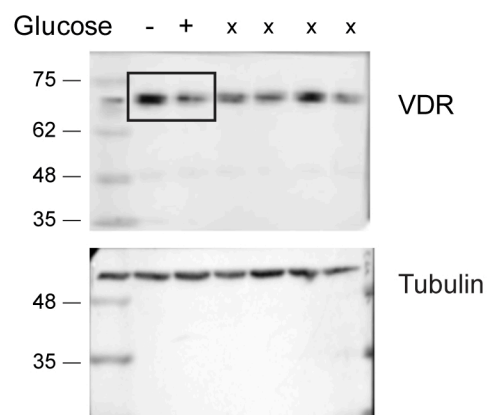

Related to Fig 3A

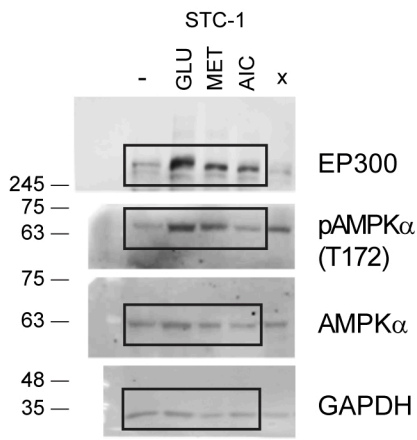

Related to Fig 3B

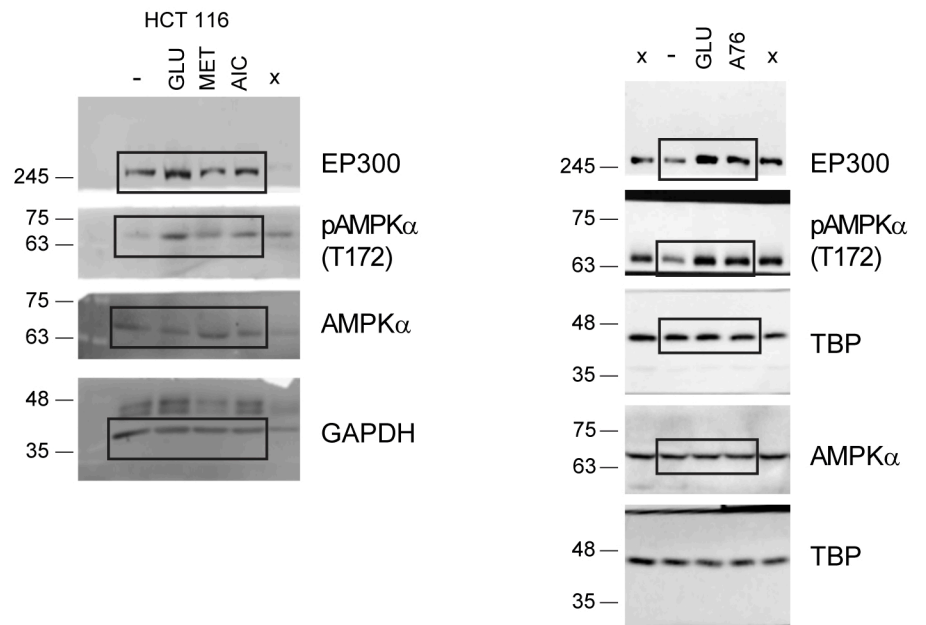

Related to Fig 3C

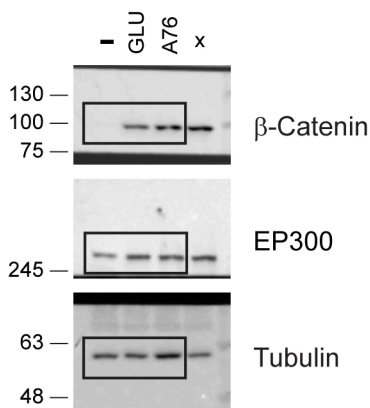

Related to Fig 3D

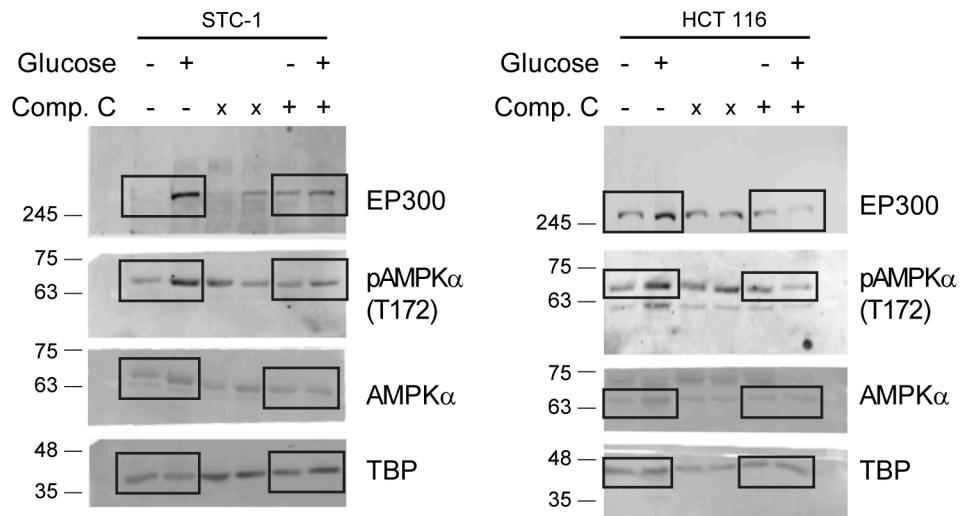

Related to Figure 3E

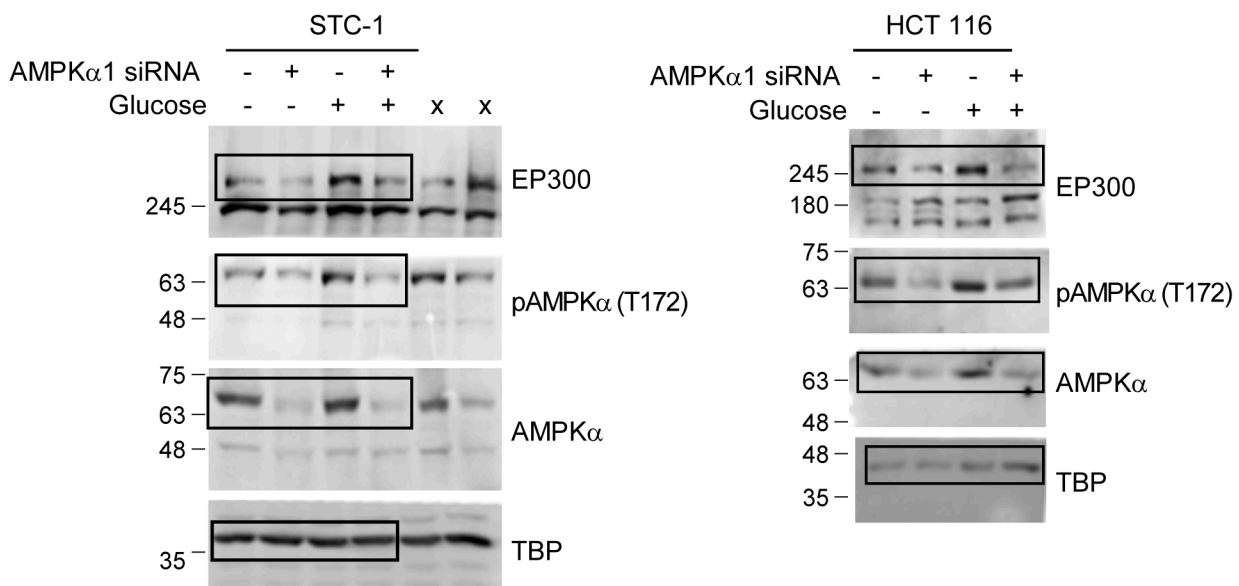

# Related to Figure 3F

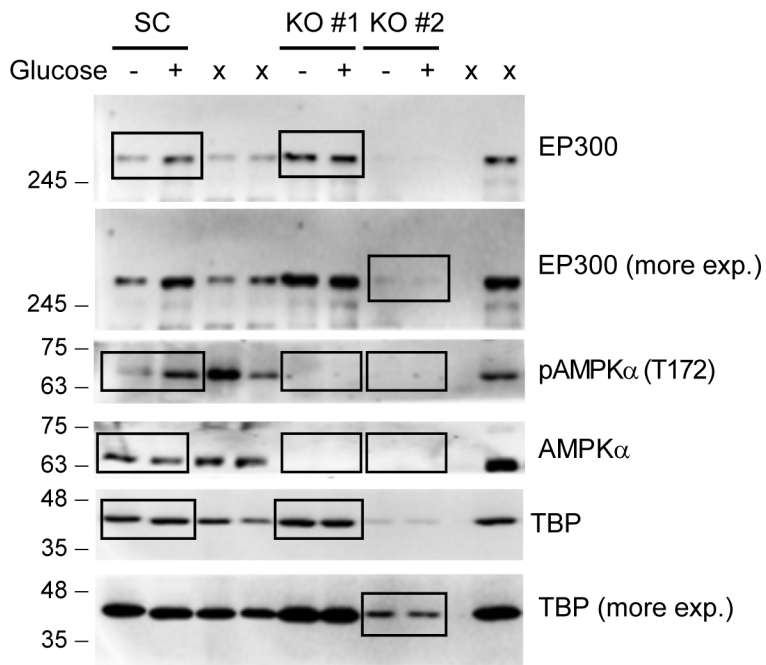

### Related to Figure 4B

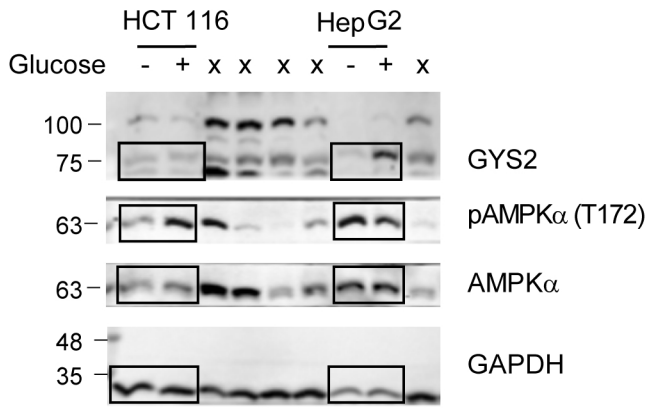

### Related to Figure 4C

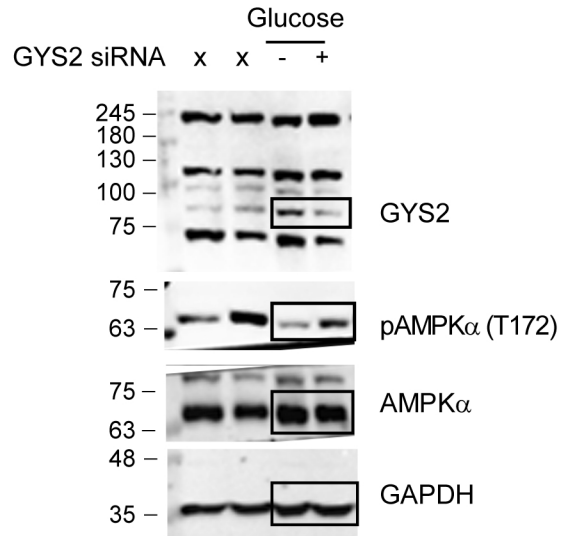

### Related to Figure 4F

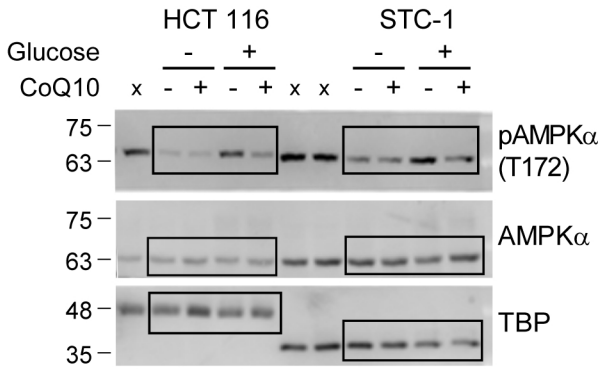

### Related to Figure 4G

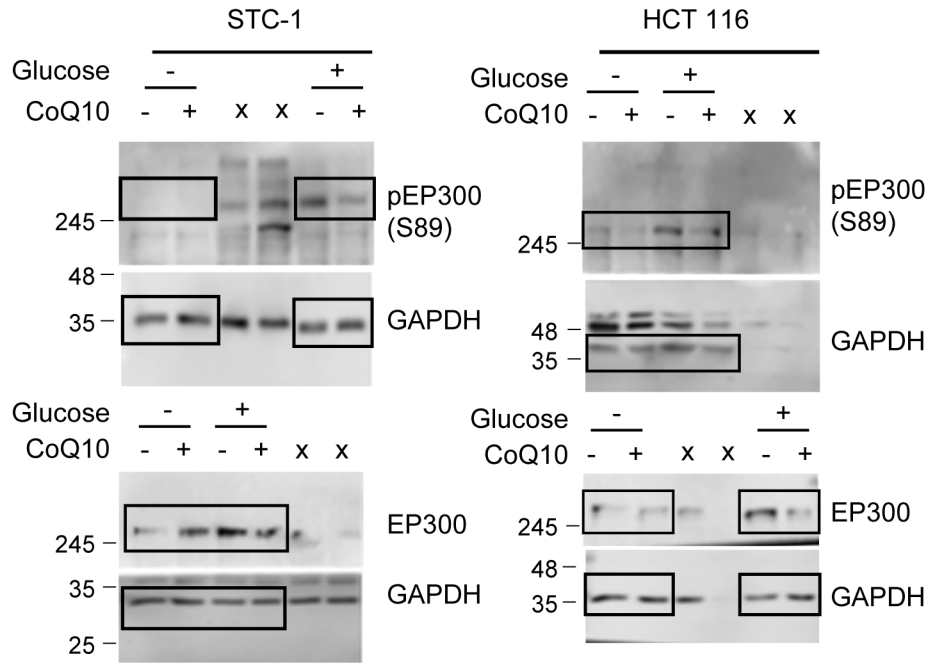

### Related to Figure 5H

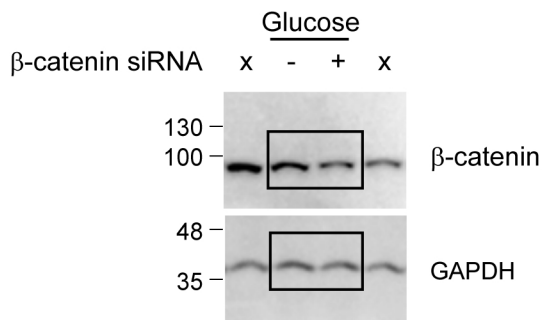

## Related to Figure S1A

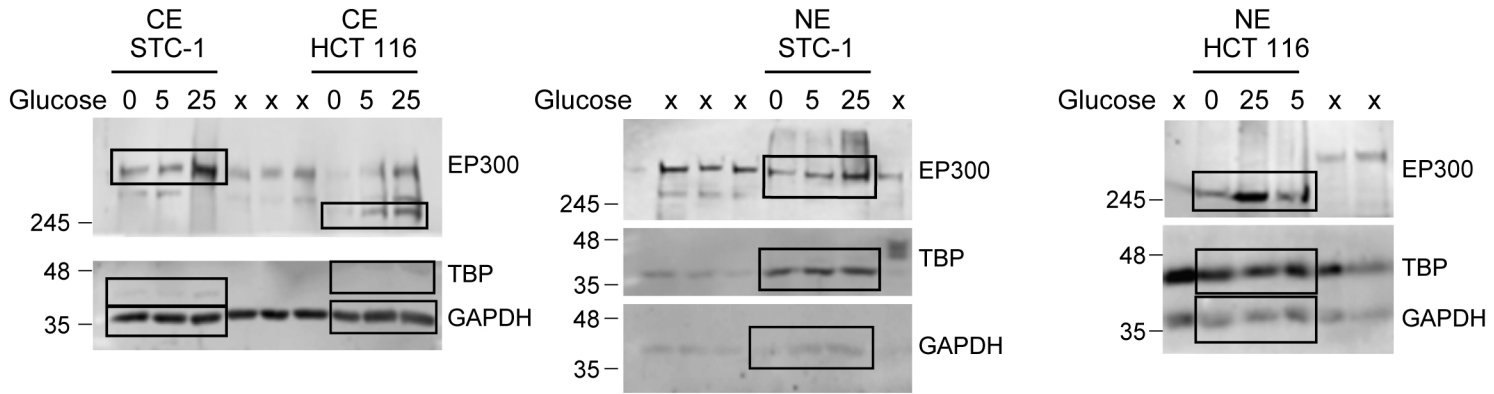

## Related to Figure S1C

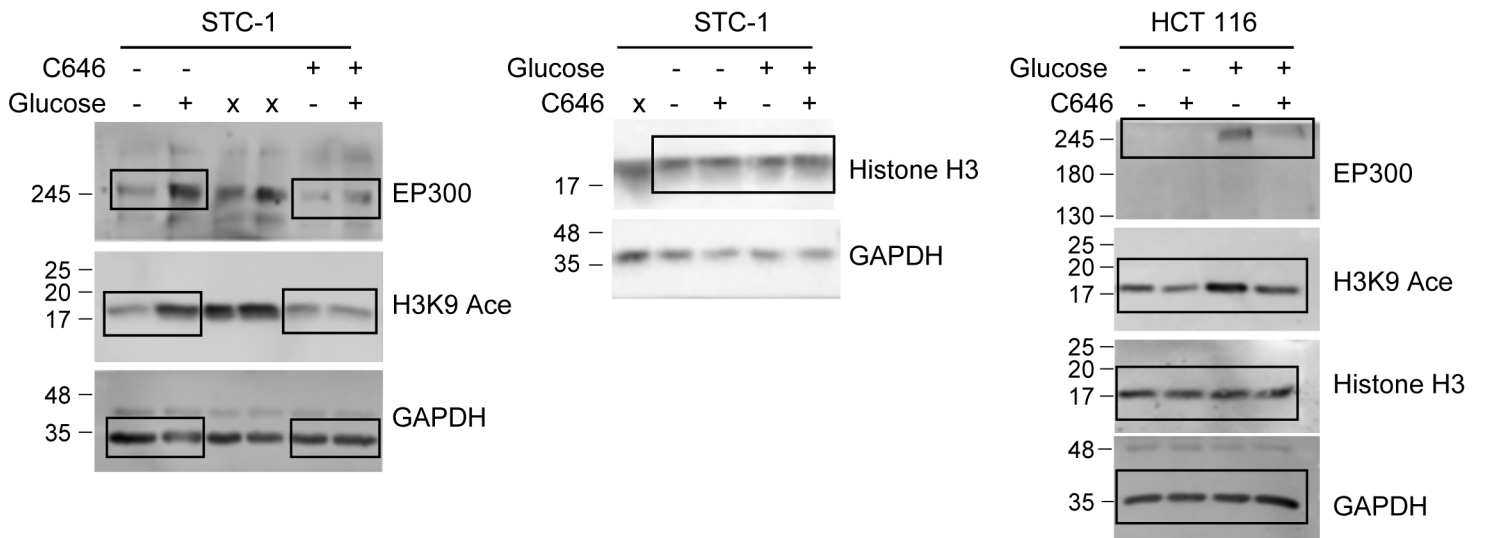

## Related to Figure S2A

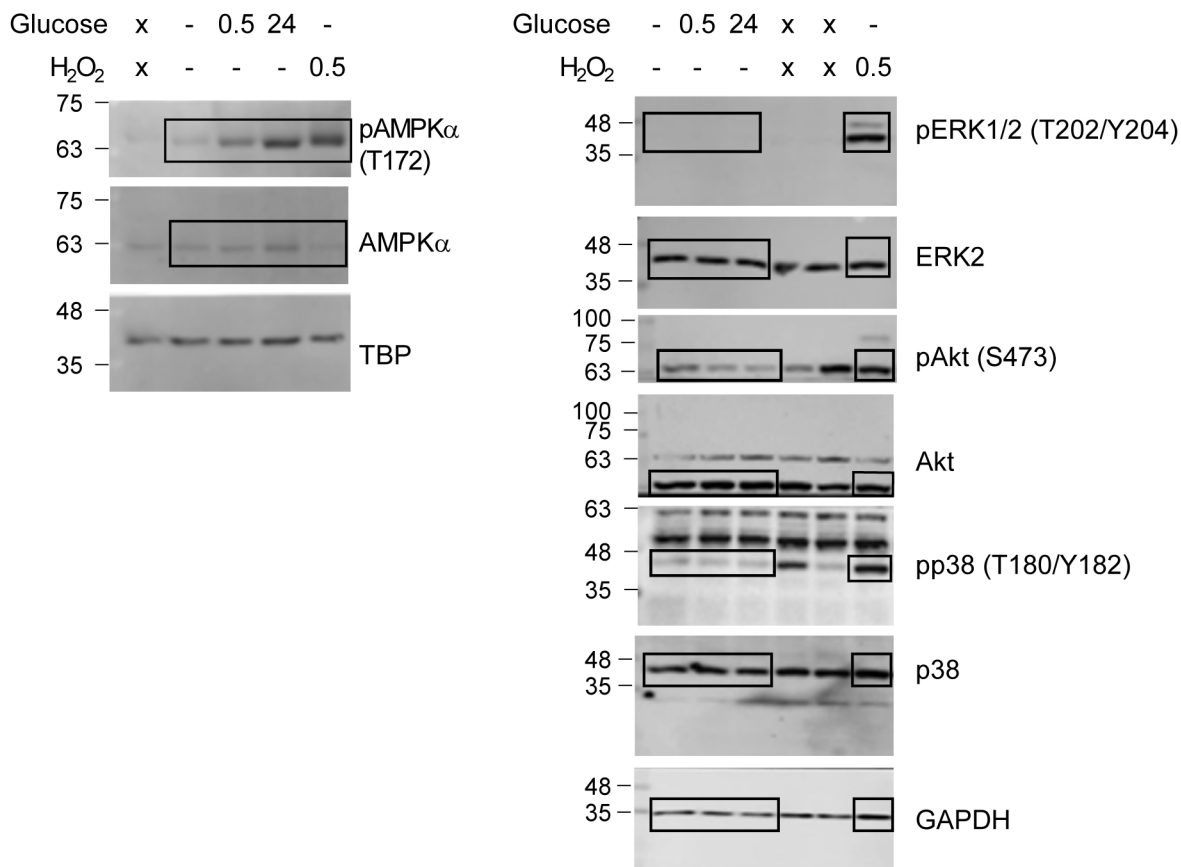

### Related to Figure S3A

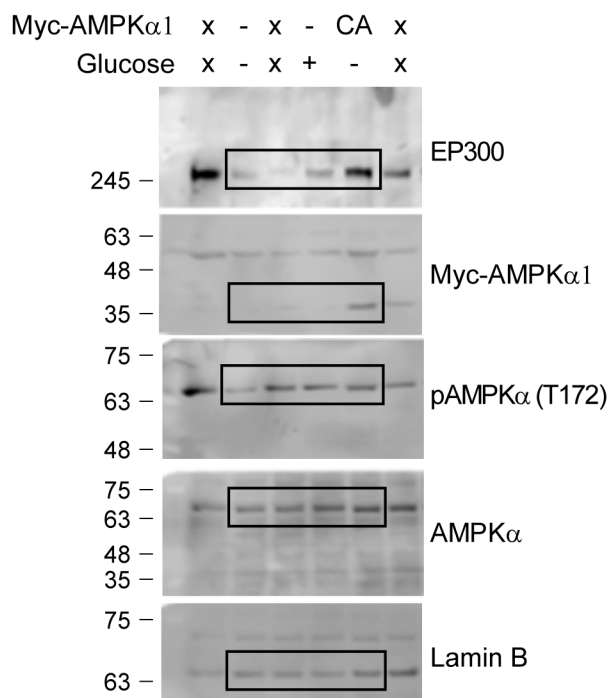

### Related to Figure S3B

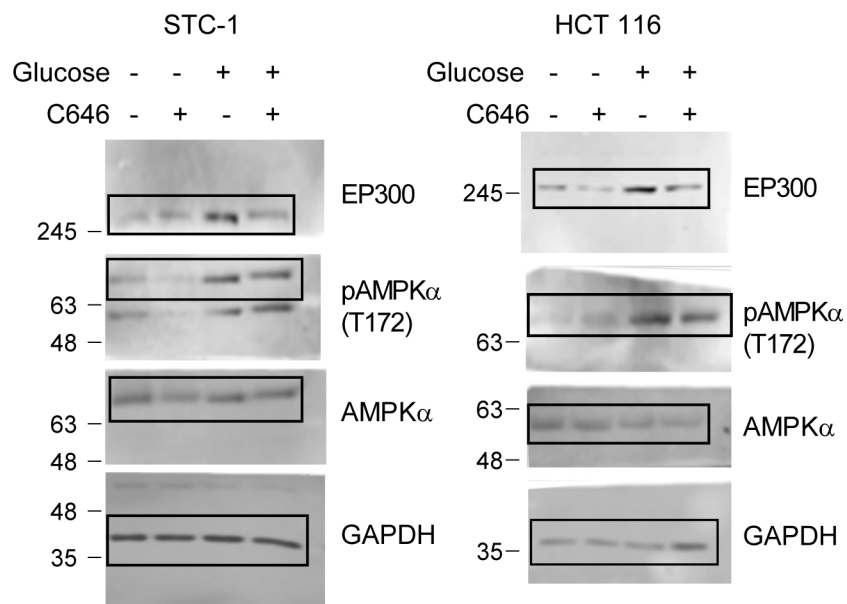

### Related to Figure S3C

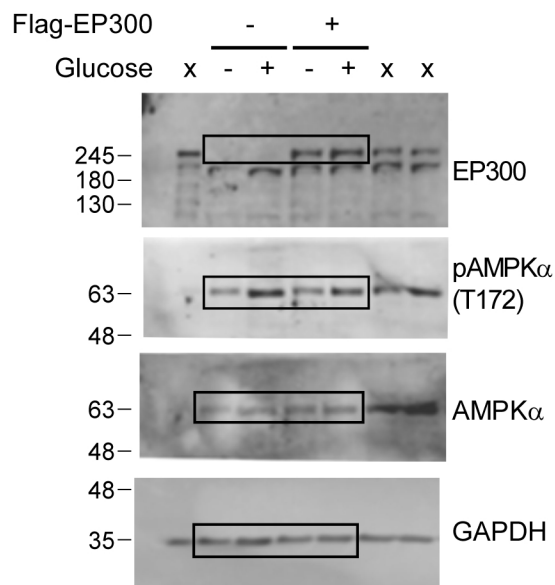



### Related to Figure S4A

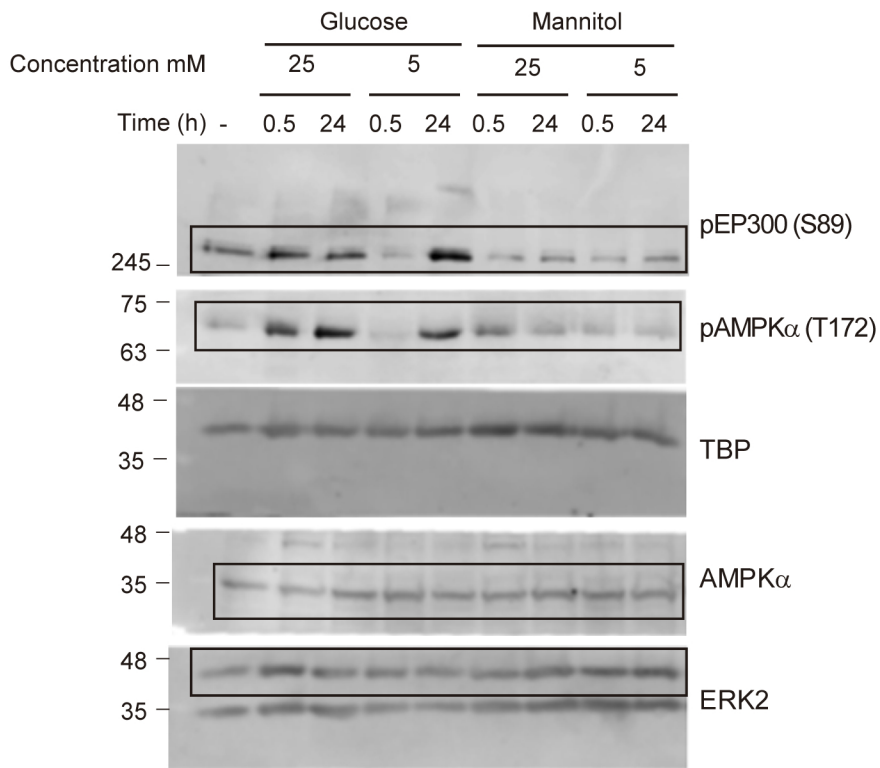

### Related to Figure S4B

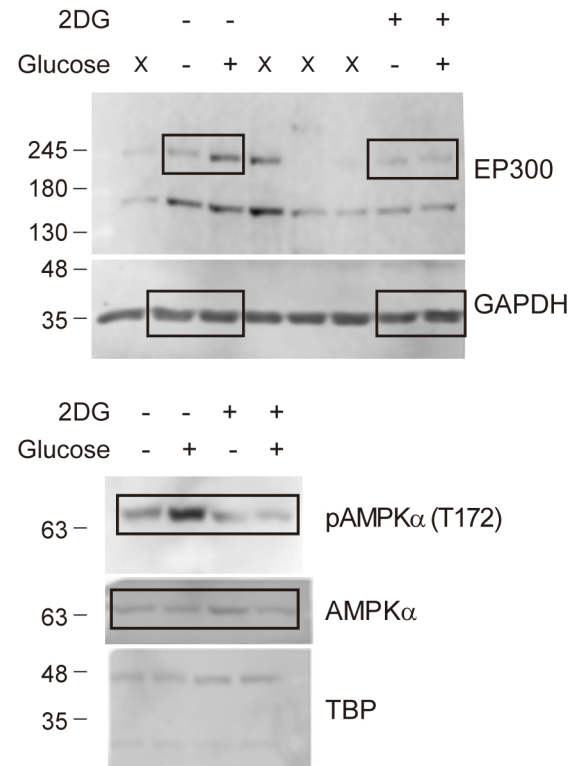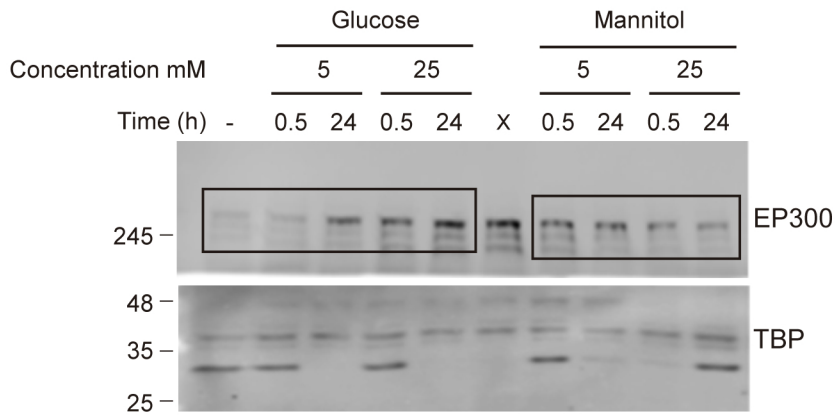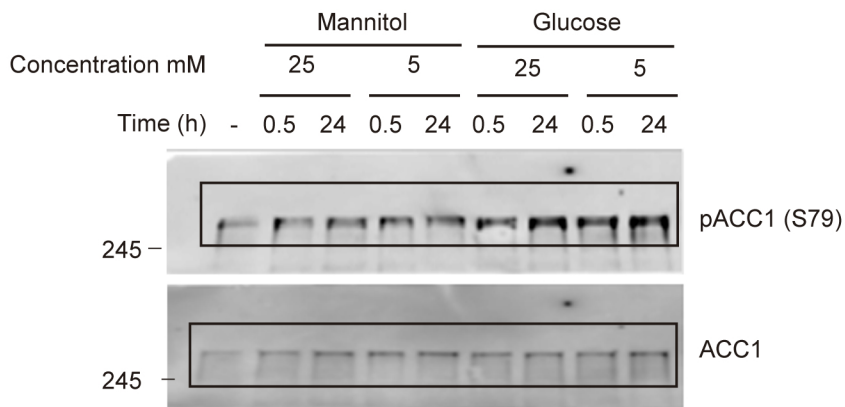

Supplement: pbio.3000732.s009.pdf [file pbio.3000732.s009.pdf]
